# Supplementary material for: A novel Ti-based nanoglass composite with submicron–nanometer-sized hierarchical structures to modulate osteoblast behaviors
Source: Royal Society of Chemistry journal article supplement (doi:10.1039/c3tb20153h), 2013-01-01
Supplement: c3tb20153h.pdf [file c3tb20153h.pdf]

### Supplementary Information

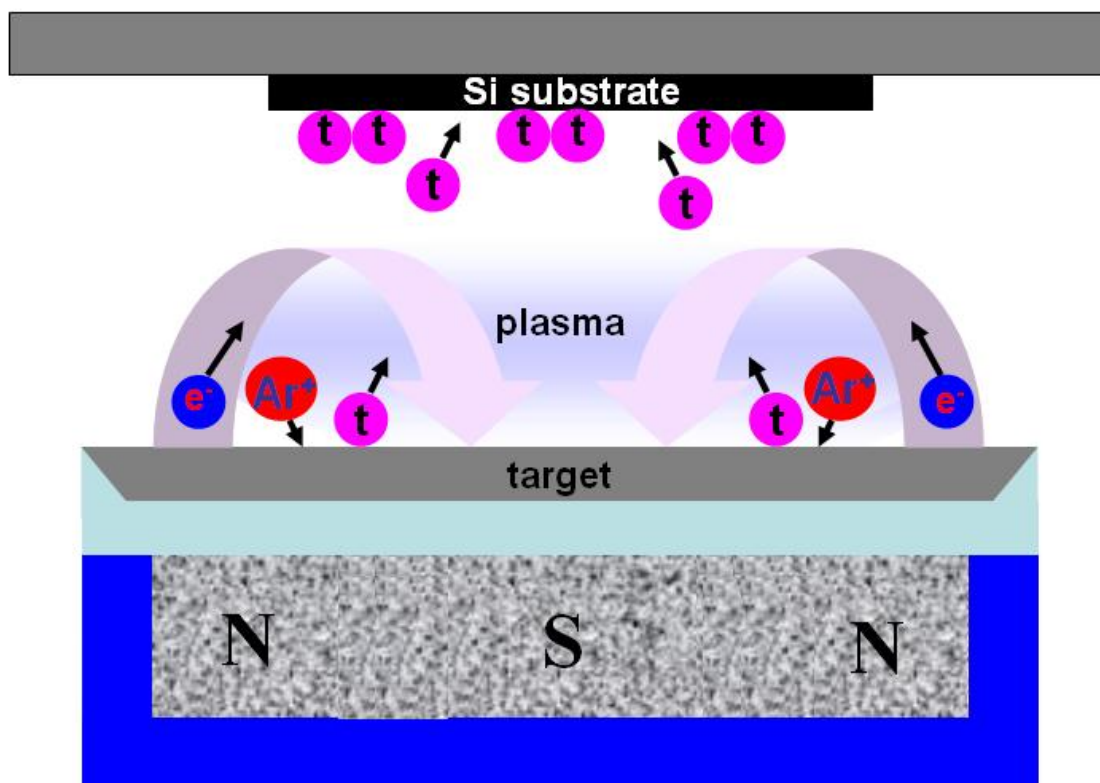

**Figure S1.** Schematic illustration for synthesis of the Ti-based nanoglass composite.

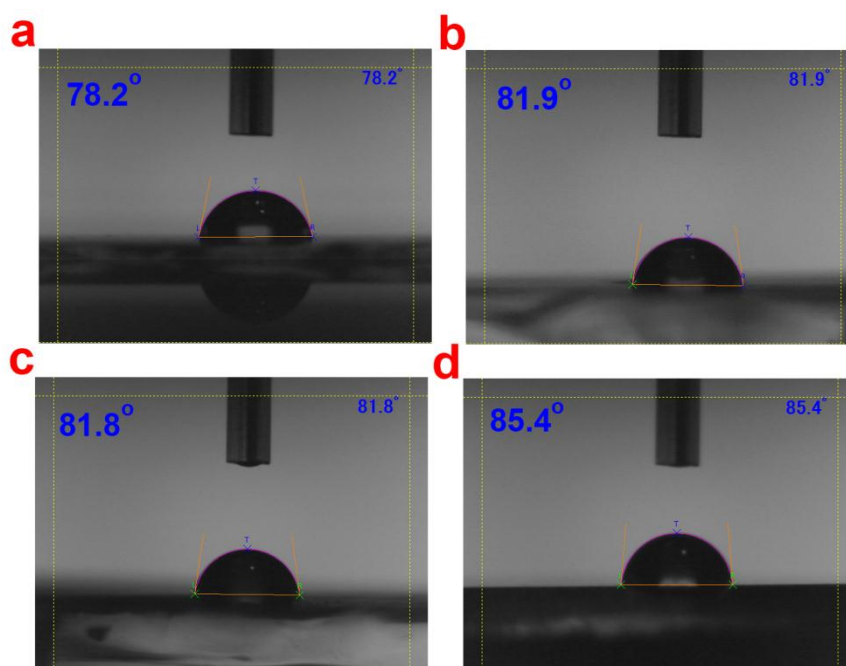

**Figure S2. Water contact angles of the samples: (a) NGC-1; (b) MGR; (c) MGS; (d)**

pure Ti.

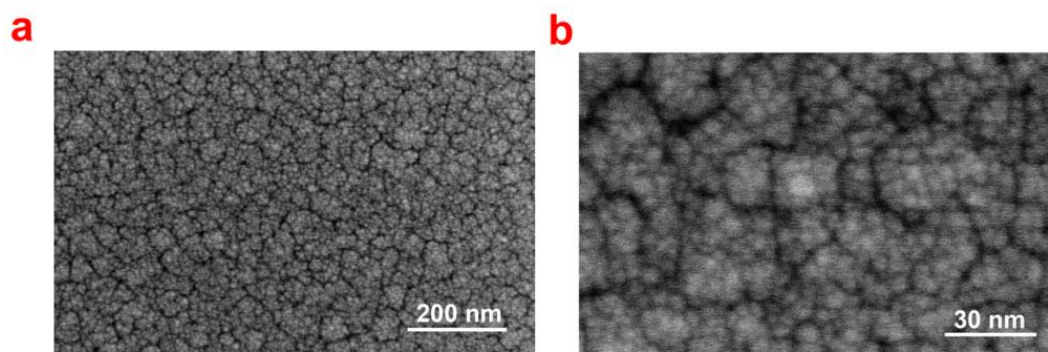

**Figure S3.** SEM images of the NGC-2 sample.

**Table S1** Real time qRT-PCR primer sets

| Gene             | Direction | Sequence (5'-3')       |
|------------------|-----------|------------------------|
| $\beta$ -actin   | Forward   | CCTGGCACCCAGCACAAT     |
|                  | Reverse   | GGGCCGGACTCGTCATACT    |
| Cbfa-1/Runx2     | Forward   | AGTGATTTAGGGCGCATTCTT  |
|                  | Reverse   | GGAGGGCGGGCGTGGGTTCT   |
| Type I collagen  | Forward   | CCTGCGTGTACCCCACTCA    |
|                  | Reverse   | ACCAGACATGCCTCTTGTCCTT |
| Osteocalcin      | Forward   | AGCAAAGGTGCAGCCTTTGT   |
|                  | Reverse   | GCGCCTGGGTCTCTTCACT    |
| Type II collagen | Forward   | TGGCCTGAGACAGCATGAC    |
|                  | Reverse   | AGTGTTGGGAGCCAGATTGT   |
| Sox9             | Forward   | CATCCCGCAGACCCACAG     |
|                  | Reverse   | TCCCCTCAAATGGTAATGAATC |
| Aggrecan         | Forward   | TCGAGGACAGCGAGGCC      |
|                  | Reverse   | TCGAGGGTGTAGCGTGTAGAGA |
